# Supplementary material
Source: publisher figshare collection journal article supplement (https://frontiersin.figshare.com/ndownloader/files/30724502)
Supplement: Supplementary file 1 [file 30724502]

## Sheet: Sheet1
Accession Number	Location	Reference		Abbreviation
GQ861826	Beaufort Sea	Hunt et al. 2010		BeauSea
GQ861827	Beaufort Sea	Hunt et al. 2010		BeauSea
GQ861828	Beaufort Sea	Hunt et al. 2010		BeauSea
GQ861830	Beaufort Sea	Hunt et al. 2010		BeauSea
FJ876923	Eastern North Pacific	Jennings et al. 2010		ENPac
HM862494	Hudson Bay	Layton et al. 2014		NCanada
HM862496	Hudson Bay	Layton et al. 2014		NCanada
KX871888	Sea of Japan, Rudnaya Bay	Chichvarkhin 2016		WNPac
KX871889	Sea of Japan, Rudnaya Bay	Chichvarkhin 2016		WNPac
AB859527	Svalbard, Hornsund	Sromek et al. 2015		Svbd
AB859528	Svalbard, Hornsund	Sromek et al. 2015		Svbd
AB859529	Svalbard, Hornsund	Sromek et al. 2015		Svbd
AB859530	Svalbard, Hornsund	Sromek et al. 2015		Svbd
AB859531	Svalbard, Hornsund	Sromek et al. 2015		Svbd
AB859532	Svalbard, Hornsund	Sromek et al. 2015		Svbd
AB859533	Svalbard, Hornsund	Sromek et al. 2015		Svbd
AB859534	Svalbard, Hornsund	Sromek et al. 2015		Svbd
AB859535	Svalbard, Hornsund	Sromek et al. 2015		Svbd
AB859536	Svalbard, Hornsund	Sromek et al. 2015		Svbd
AB859537	Svalvard, Isfjorden	Sromek et al. 2015		Svbd
AB859538	Svalvard, Isfjorden	Sromek et al. 2015		Svbd
AB859539	Svalvard, Isfjorden	Sromek et al. 2015		Svbd
AB859540	Svalvard, Isfjorden	Sromek et al. 2015		Svbd
AB859541	Svalvard, Isfjorden	Sromek et al. 2015		Svbd
AB859542	Svalvard, Isfjorden	Sromek et al. 2015		Svbd
AB859543	Svalvard, Isfjorden	Sromek et al. 2015		Svbd
AB859544	Svalvard, Isfjorden	Sromek et al. 2015		Svbd
AB859545	Svalvard, Isfjorden	Sromek et al. 2015		Svbd
AB859546	Svalvard, Isfjorden	Sromek et al. 2015		Svbd
AB859547	Svalvard, Isfjorden	Sromek et al. 2015		Svbd
AB859548	Svalvard, Isfjorden	Sromek et al. 2015		Svbd
AB859549	Svalvard, Isfjorden	Sromek et al. 2015		Svbd
AB859550	Svalvard, Isfjorden	Sromek et al. 2015		Svbd
AB859551	Svalvard, Isfjorden	Sromek et al. 2015		Svbd
AB859552	Svalvard, Isfjorden	Sromek et al. 2015		Svbd
AB859553	Svalvard, Isfjorden	Sromek et al. 2015		Svbd
AB859554	Svalvard, Isfjorden	Sromek et al. 2015		Svbd
AB859555	Svalvard, Isfjorden	Sromek et al. 2015		Svbd
AB859556	Svalvard, Isfjorden	Sromek et al. 2015		Svbd
AB859557	Svalvard, Isfjorden	Sromek et al. 2015		Svbd
AB859558	Svalvard, Isfjorden	Sromek et al. 2015		Svbd
AB859559	Svalvard, Isfjorden	Sromek et al. 2015		Svbd
AB859560	Svalvard, Isfjorden	Sromek et al. 2015		Svbd
AB859561	Svalvard, Isfjorden	Sromek et al. 2015		Svbd
AB859562	Svalvard, Isfjorden	Sromek et al. 2015		Svbd
AB859563	Svalvard, Isfjorden	Sromek et al. 2015		Svbd
AB859564	Svalvard, Isfjorden	Sromek et al. 2015		Svbd
AB859565	Svalvard, Isfjorden	Sromek et al. 2015		Svbd
AB859566	Svalvard, Isfjorden	Sromek et al. 2015		Svbd
AB859567	Svalvard, Isfjorden	Sromek et al. 2015		Svbd
AB859568	Svalvard, Isfjorden	Sromek et al. 2015		Svbd
AB859569	Svalvard, Isfjorden	Sromek et al. 2015		Svbd
AB859570	Svalvard, Isfjorden	Sromek et al. 2015		Svbd
AB859571	Svalvard, Isfjorden	Sromek et al. 2015		Svbd
AB859572	Svalvard, Isfjorden	Sromek et al. 2015		Svbd
AB859573	Svalvard, Isfjorden	Sromek et al. 2015		Svbd
AB859574	Svalvard, Isfjorden	Sromek et al. 2015		Svbd
AB859575	Svalvard, Isfjorden	Sromek et al. 2015		Svbd
AB859576	Svalvard, Isfjorden	Sromek et al. 2015		Svbd
AB859577	Svalvard, Isfjorden	Sromek et al. 2015		Svbd
AB859578	Svalvard, Isfjorden	Sromek et al. 2015		Svbd
AB859579	Svalvard, Isfjorden	Sromek et al. 2015		Svbd
AB859580	Svalvard, Isfjorden	Sromek et al. 2015		Svbd
AB859581	Svalvard, Isfjorden	Sromek et al. 2015		Svbd
AB859582	Svalvard, Isfjorden	Sromek et al. 2015		Svbd
AB859583	Svalvard, Isfjorden	Sromek et al. 2015		Svbd
AB859584	Svalvard, Isfjorden	Sromek et al. 2015		Svbd
AB859585	Svalvard, Isfjorden	Sromek et al. 2015		Svbd
AB859586	Svalvard, Isfjorden	Sromek et al. 2015		Svbd
AB859587	Svalvard, Isfjorden	Sromek et al. 2015		Svbd
AB859588	Svalvard, Isfjorden	Sromek et al. 2015		Svbd
AB859589	Svalvard, Isfjorden	Sromek et al. 2015		Svbd
AB859590	Svalvard, Isfjorden	Sromek et al. 2015		Svbd
AB859591	Svalvard, Isfjorden	Sromek et al. 2015		Svbd
AB859592	Svalvard, Isfjorden	Sromek et al. 2015		Svbd
AB859593	Svalvard, Isfjorden	Sromek et al. 2015		Svbd
MH379290	Kara Sea, South St.	Abyzova et al. 2018		Kara
MH379291	Kara Sea, South St.	Abyzova et al. 2018		Kara
MH379292	Kara Sea, South St.	Abyzova et al. 2018		Kara
MH379293	Kara Sea, South St.	Abyzova et al. 2018		Kara
MH379294	Kara Sea, South St.	Abyzova et al. 2018		Kara
MH379295	Kara Sea, South St.	Abyzova et al. 2018		Kara
MH379296	Kara Sea, South St.	Abyzova et al. 2018		Kara
MH379297	Kara Sea, South St.	Abyzova et al. 2018		Kara
MH379298	Kara Sea, South St.	Abyzova et al. 2018		Kara
MH379300	Kara Sea, South St.	Abyzova et al. 2018		Kara
MH379301	Kara Sea, South St.	Abyzova et al. 2018		Kara
MH379302	Kara Sea, South St.	Abyzova et al. 2018		Kara
MH379303	Kara Sea, South St.	Abyzova et al. 2018		Kara
MH379304	Kara Sea, South St.	Abyzova et al. 2018		Kara
MH379305	Kara Sea, South St.	Abyzova et al. 2018		Kara
MH379306	Kara Sea, South St.	Abyzova et al. 2018		Kara
MH379307	Kara Sea, South St.	Abyzova et al. 2018		Kara
MH379308	Kara Sea, South St.	Abyzova et al. 2018		Kara
MH379309	Kara Sea, South St.	Abyzova et al. 2018		Kara
MH379310	Kara Sea, South St.	Abyzova et al. 2018		Kara
MH379311	Kara Sea, South St.	Abyzova et al. 2018		Kara
MH379312	Kara Sea, Voronina	Abyzova et al. 2018		Kara
MH379313	Kara Sea, Voronina	Abyzova et al. 2018		Kara
MH379314	Kara Sea, Voronina	Abyzova et al. 2018		Kara
MH379315	Kara Sea, Voronina	Abyzova et al. 2018		Kara
MH379316	Kara Sea, Voronina	Abyzova et al. 2018		Kara
MH379317	Kara Sea, Voronina	Abyzova et al. 2018		Kara
MH379319	Kara Sea, Voronina	Abyzova et al. 2018		Kara
MH379320	Kara Sea, Voronina	Abyzova et al. 2018		Kara
MH379326	Kara Sea, Voronina	Abyzova et al. 2018		Kara
MH379327	Kara Sea, Voronina	Abyzova et al. 2018		Kara
MH379328	Kara Sea, Voronina	Abyzova et al. 2018		Kara
MH379329	Kara Sea, Voronina	Abyzova et al. 2018		Kara
MH379330	Kara Sea, Voronina	Abyzova et al. 2018		Kara
MH379266	Kara Sea, St. Anna Trough	Abyzova et al. 2018		Kara
MH379267	Kara Sea, St. Anna Trough	Abyzova et al. 2018		Kara
MH379268	Kara Sea, St. Anna Trough	Abyzova et al. 2018		Kara
MH379269	Kara Sea, St. Anna Trough	Abyzova et al. 2018		Kara
MH379270	Kara Sea, St. Anna Trough	Abyzova et al. 2018		Kara
MH379271	Kara Sea, St. Anna Trough	Abyzova et al. 2018		Kara
MH379272	Kara Sea, St. Anna Trough	Abyzova et al. 2018		Kara
MH379273	Kara Sea, St. Anna Trough	Abyzova et al. 2018		Kara
MH379274	Kara Sea, St. Anna Trough	Abyzova et al. 2018		Kara
MH379275	Kara Sea, St. Anna Trough	Abyzova et al. 2018		Kara
MH379276	Kara Sea, St. Anna Trough	Abyzova et al. 2018		Kara
MH379277	Kara Sea, St. Anna Trough	Abyzova et al. 2018		Kara
MH379278	Kara Sea, St. Anna Trough	Abyzova et al. 2018		Kara
MH379279	Kara Sea, St. Anna Trough	Abyzova et al. 2018		Kara
MH379280	Kara Sea, St. Anna Trough	Abyzova et al. 2018		Kara
MH379281	Kara Sea, St. Anna Trough	Abyzova et al. 2018		Kara
MH379282	Kara Sea, St. Anna Trough	Abyzova et al. 2018		Kara
MH379283	Kara Sea, St. Anna Trough	Abyzova et al. 2018		Kara
MH379284	Kara Sea, St. Anna Trough	Abyzova et al. 2018		Kara
MH379285	Kara Sea, St. Anna Trough	Abyzova et al. 2018		Kara
MH379286	Kara Sea, St. Anna Trough	Abyzova et al. 2018		Kara
MH379287	Kara Sea, St. Anna Trough	Abyzova et al. 2018		Kara
MH379288	Kara Sea, St. Anna Trough	Abyzova et al. 2018		Kara
MH379289	Kara Sea, St. Anna Trough	Abyzova et al. 2018		Kara
MN503694	Greenland	Kohnert et al 2020		Grnld
MN503695	Greenland	Kohnert et al 2020		Grnld
MN503696	Greenland	Kohnert et al 2020		Grnld
MN503697	Greenland	Kohnert et al 2020		Grnld
MN503698	Greenland	Kohnert et al 2020		Grnld
MN503699	Greenland	Kohnert et al 2020		Grnld
MN503701	White Sea, Russia	Kohnert et al 2020		WtSea
MN503702	White Sea, Russia	Kohnert et al 2020		WtSea
MN503703	Sea of Okhotsk, Western North Pacific	Kohnert et al 2020		WNPac
MN503704	Sea of Okhotsk, Western North Pacific	Kohnert et al 2020		WNPac
MN503705	Sea of Okhotsk, Western North Pacific	Kohnert et al 2020		WNPac
MN503706	Sea of Okhotsk, Western North Pacific	Kohnert et al 2020		WNPac
MN503707	Sea of Okhotsk, Western North Pacific	Kohnert et al 2020		WNPac
MN503708	Svalbard	Kohnert et al 2020		Svbd
MN503709	Svalbard	Kohnert et al 2020		Svbd
MN503710	Sea of Okhotsk, Northwest Pacific Ocean	Kohnert et al 2020		WNPac
MN503711	Svalbard	Kohnert et al 2020		Svbd
MN503712	Kuril-Kamchatka Trench, Western North Pacific	Kohnert et al 2020		WNPac
MN503713	Kuril-Kamchatka Trench, Western North Pacific	Kohnert et al 2020		WNPac
MN503714	Kuril-Kamchatka Trench, Western North Pacific	Kohnert et al 2020		WNPac
MN503715	Kuril-Kamchatka Trench, Western North Pacific	Kohnert et al 2020		WNPac
MN503716	Kuril-Kamchatka Trench, Western North Pacific	Kohnert et al 2020		WNPac
LC185064	Tsugaru, Western North Pacific	Shimuzu et al. 2018		WNPac
LC185065	Tsugaru, Western North Pacific	Shimuzu et al. 2018		WNPac
LC185066	Tsugaru, Western North Pacific	Shimuzu et al. 2018		WNPac
LC185067	Tsugaru, Western North Pacific	Shimuzu et al. 2018		WNPac
LC185068	Tsugaru, Western North Pacific	Shimuzu et al. 2018		WNPac
LC185069	Tsugaru, Western North Pacific	Shimuzu et al. 2018		WNPac
LC185070	Tsugaru, Western North Pacific	Shimuzu et al. 2018		WNPac
LC185071	Tsugaru, Western North Pacific	Shimuzu et al. 2018		WNPac
LC185072	Tsugaru, Western North Pacific	Shimuzu et al. 2018		WNPac
LC185073	Tsugaru, Western North Pacific	Shimuzu et al. 2018		WNPac
LC229751	Tsugaru, Western North Pacific	Shimuzu et al. 2018		WNPac
LC229752	Tsugaru, Western North Pacific	Shimuzu et al. 2018		WNPac
LC229753	Tsugaru, Western North Pacific	Shimuzu et al. 2018		WNPac
LC229754	Tsugaru, Western North Pacific	Shimuzu et al. 2018		WNPac
LC229755	Tsugaru, Western North Pacific	Shimuzu et al. 2018		WNPac
LC229756	Tsugaru, Western North Pacific	Shimuzu et al. 2018		WNPac
LC229757	Tsugaru, Western North Pacific	Shimuzu et al. 2018		WNPac
LC185015	KNOT, Western North Pacific	Shimuzu et al. 2018		WNPac
LC185016	KNOT, Western North Pacific	Shimuzu et al. 2018		WNPac
LC185017	KNOT, Western North Pacific	Shimuzu et al. 2018		WNPac
LC185018	KNOT, Western North Pacific	Shimuzu et al. 2018		WNPac
LC185019	KNOT, Western North Pacific	Shimuzu et al. 2018		WNPac
LC185020	KNOT, Western North Pacific	Shimuzu et al. 2018		WNPac
LC185021	KNOT, Western North Pacific	Shimuzu et al. 2018		WNPac
LC185022	KNOT, Western North Pacific	Shimuzu et al. 2018		WNPac
LC185023	KNOT, Western North Pacific	Shimuzu et al. 2018		WNPac
LC185024	KNOT, Western North Pacific	Shimuzu et al. 2018		WNPac
LC185025	KNOT, Western North Pacific	Shimuzu et al. 2018		WNPac
LC185026	KNOT, Western North Pacific	Shimuzu et al. 2018		WNPac
LC185027	KNOT, Western North Pacific	Shimuzu et al. 2018		WNPac
LC185028	KNOT, Western North Pacific	Shimuzu et al. 2018		WNPac
LC185029	KNOT, Western North Pacific	Shimuzu et al. 2018		WNPac
LC185030	KNOT, Western North Pacific	Shimuzu et al. 2018		WNPac
LC185031	KNOT, Western North Pacific	Shimuzu et al. 2018		WNPac
LC185032	KNOT, Western North Pacific	Shimuzu et al. 2018		WNPac
LC229727	KNOT, Western North Pacific	Shimuzu et al. 2018		WNPac
LC229728	KNOT, Western North Pacific	Shimuzu et al. 2018		WNPac
LC229729	KNOT, Western North Pacific	Shimuzu et al. 2018		WNPac
LC229730	KNOT, Western North Pacific	Shimuzu et al. 2018		WNPac
LC229731	KNOT, Western North Pacific	Shimuzu et al. 2018		WNPac
LC229732	KNOT, Western North Pacific	Shimuzu et al. 2018		WNPac
LC229733	KNOT, Western North Pacific	Shimuzu et al. 2018		WNPac
LC229734	KNOT, Western North Pacific	Shimuzu et al. 2018		WNPac
LC229766	KNOT, Western North Pacific	Shimuzu et al. 2018		WNPac
LC229767	KNOT, Western North Pacific	Shimuzu et al. 2018		WNPac
LC229768	KNOT, Western North Pacific	Shimuzu et al. 2018		WNPac
LC229769	KNOT, Western North Pacific	Shimuzu et al. 2018		WNPac
LC185045	K2, Western North Pacific	Shimuzu et al. 2018		WNPac
LC185046	K2, Western North Pacific	Shimuzu et al. 2018		WNPac
LC185047	K2, Western North Pacific	Shimuzu et al. 2018		WNPac
LC185048	K2, Western North Pacific	Shimuzu et al. 2018		WNPac
LC185049	K2, Western North Pacific	Shimuzu et al. 2018		WNPac
LC185050	K2, Western North Pacific	Shimuzu et al. 2018		WNPac
LC185051	K2, Western North Pacific	Shimuzu et al. 2018		WNPac
LC185052	K2, Western North Pacific	Shimuzu et al. 2018		WNPac
LC185053	K2, Western North Pacific	Shimuzu et al. 2018		WNPac
LC185054	K2, Western North Pacific	Shimuzu et al. 2018		WNPac
LC185055	K2, Western North Pacific	Shimuzu et al. 2018		WNPac
LC185056	K2, Western North Pacific	Shimuzu et al. 2018		WNPac
LC185057	K2, Western North Pacific	Shimuzu et al. 2018		WNPac
LC185058	K2, Western North Pacific	Shimuzu et al. 2018		WNPac
LC185059	K2, Western North Pacific	Shimuzu et al. 2018		WNPac
LC185060	K2, Western North Pacific	Shimuzu et al. 2018		WNPac
LC185061	K2, Western North Pacific	Shimuzu et al. 2018		WNPac
LC185062	K2, Western North Pacific	Shimuzu et al. 2018		WNPac
LC185063	K2, Western North Pacific	Shimuzu et al. 2018		WNPac
LC185033	ESM, Western North pacific	Shimuzu et al. 2018		WNPac
LC185034	ESM, Western North pacific	Shimuzu et al. 2018		WNPac
LC185035	ESM, Western North pacific	Shimuzu et al. 2018		WNPac
LC185036	ESM, Western North pacific	Shimuzu et al. 2018		WNPac
LC185037	ESM, Western North Pacific	Shimuzu et al. 2018		WNPac
LC185038	ESM, Western North Pacific	Shimuzu et al. 2018		WNPac
LC185039	ESM, Western North Pacific	Shimuzu et al. 2018		WNPac
LC185040	ESM, Western North Pacific	Shimuzu et al. 2018		WNPac
LC185041	ESM, Western North Pacific	Shimuzu et al. 2018		WNPac
LC185042	ESM, Western North Pacific	Shimuzu et al. 2018		WNPac
LC185043	ESM, Western North Pacific	Shimuzu et al. 2018		WNPac
LC185044	ESM, Western North Pacific	Shimuzu et al. 2018		WNPac
LC229758	ESM, Western North Pacific	Shimuzu et al. 2018		WNPac
LC229759	ESM, Western North Pacific	Shimuzu et al. 2018		WNPac
LC229760	ESM, Western North Pacific	Shimuzu et al. 2018		WNPac
LC229761	ESM, Western North Pacific	Shimuzu et al. 2018		WNPac
LC229762	ESM, Western North Pacific	Shimuzu et al. 2018		WNPac
LC229763	ESM, Western North Pacific	Shimuzu et al. 2018		WNPac
LC229764	ESM, Western North Pacific	Shimuzu et al. 2018		WNPac
LC229765	ESM, Western North Pacific	Shimuzu et al. 2018		WNPac
LC229735	ESM, Western North Pacific	Shimuzu et al. 2018		WNPac
LC229736	ESM, Western North Pacific	Shimuzu et al. 2018		WNPac
LC229737	ESM, Western North Pacific	Shimuzu et al. 2018		WNPac
LC229738	ESM, Western North Pacific	Shimuzu et al. 2018		WNPac
LC229739	ESM, Western North Pacific	Shimuzu et al. 2018		WNPac
LC229740	ESM, Western North Pacific	Shimuzu et al. 2018		WNPac
LC229741	ESM, Western North Pacific	Shimuzu et al. 2018		WNPac
LC229742	ESM, Western North Pacific	Shimuzu et al. 2018		WNPac
LC229743	ESM, Western North Pacific	Shimuzu et al. 2018		WNPac
LC229744	ESM, Western North Pacific	Shimuzu et al. 2018		WNPac
LC229745	ESM, Western North Pacific	Shimuzu et al. 2018		WNPac
LC229746	ESM, Western North Pacific	Shimuzu et al. 2018		WNPac
LC229747	ESM, Western North Pacific	Shimuzu et al. 2018		WNPac
LC229748	ESM, Western North Pacific	Shimuzu et al. 2018		WNPac
LC229749	ESM, Western North Pacific	Shimuzu et al. 2018		WNPac
LC229750	ESM, Western North Pacific	Shimuzu et al. 2018		WNPac
